# Supplementary material
Source: publisher site journal article supplement (https://www.dovepress.com/article/215933)
Supplement: Supplementary file 1 [file get_supplementary_file.php]

## **SUPPLEMENTARY MATERIALS**

**Supplementary Table I.** Effect estimates of the associations between genetic instruments of smoking and stroke

**Supplementary Table II.** The effect estimates for the associations of smoking with stroke after excluding the invalid instruments using the IVW method.

**Supplementary Table III.** Associations between smoking-associated loci and other traits from the GWAS catalog.

**Members of MEGASTROKE consortium**

**Supplementary Table I.** Effect estimates of the associations between genetic instruments of smoking and stroke

| SNP         | Chr | Pos       | EA | SNP - smoking <sup>*</sup> |       | SNP - IS <sup>†</sup> |       |          | SNP - LV-IS <sup>†</sup> |       |          | SNP - CE-IS <sup>†</sup> |       |          | SNP - SV-IS <sup>†</sup> |       |          |
|-------------|-----|-----------|----|----------------------------|-------|-----------------------|-------|----------|--------------------------|-------|----------|--------------------------|-------|----------|--------------------------|-------|----------|
|             |     |           |    | $\beta$                    | SE    | $\beta$               | SE    | <i>P</i> | $\beta$                  | SE    | <i>P</i> | $\beta$                  | SE    | <i>P</i> | $\beta$                  | SE    | <i>P</i> |
| rs10030552  | 4   | 140972264 | A  | 0.015                      | 0.002 | -0.009                | 0.012 | 0.480    | -0.035                   | 0.031 | 0.260    | 0.020                    | 0.023 | 0.389    | -0.003                   | 0.028 | 0.917    |
| rs1004787   | 2   | 45159091  | A  | 0.018                      | 0.002 | -0.013                | 0.010 | 0.202    | -0.005                   | 0.025 | 0.857    | -0.027                   | 0.020 | 0.168    | -0.002                   | 0.024 | 0.941    |
| rs10268837  | 7   | 3467366   | T  | 0.016                      | 0.002 | 0.007                 | 0.010 | 0.503    | 0.001                    | 0.025 | 0.971    | 0.019                    | 0.020 | 0.329    | -0.017                   | 0.023 | 0.477    |
| rs10461104  | 4   | 27490579  | A  | 0.013                      | 0.002 | -0.012                | 0.010 | 0.243    | -0.029                   | 0.026 | 0.268    | 0.003                    | 0.020 | 0.902    | -0.016                   | 0.024 | 0.505    |
| rs10756197  | 9   | 11178030  | A  | 0.012                      | 0.002 | 0.009                 | 0.010 | 0.365    | 0.004                    | 0.025 | 0.867    | -0.008                   | 0.019 | 0.691    | 0.021                    | 0.023 | 0.368    |
| rs11065979  | 12  | 112059557 | T  | 0.013                      | 0.002 | 0.078                 | 0.010 | 0.000    | 0.099                    | 0.026 | 0.000    | 0.057                    | 0.020 | 0.004    | 0.107                    | 0.024 | 0.000    |
| rs11134672  | 5   | 170395820 | A  | 0.014                      | 0.002 | 0.013                 | 0.011 | 0.244    | -0.017                   | 0.026 | 0.508    | 0.014                    | 0.021 | 0.502    | 0.061                    | 0.025 | 0.014    |
| rs11166986  | 8   | 141656155 | A  | 0.012                      | 0.002 | -0.016                | 0.010 | 0.104    | -0.018                   | 0.025 | 0.459    | -0.039                   | 0.020 | 0.045    | -0.023                   | 0.023 | 0.326    |
| rs1174864   | 7   | 53127559  | A  | 0.012                      | 0.002 | -0.024                | 0.010 | 0.018    | 0.012                    | 0.025 | 0.632    | -0.025                   | 0.019 | 0.190    | -0.044                   | 0.023 | 0.062    |
| rs11808210  | 1   | 227515049 | A  | 0.022                      | 0.004 | -0.019                | 0.019 | 0.332    | -0.027                   | 0.049 | 0.585    | -0.013                   | 0.039 | 0.742    | -0.080                   | 0.047 | 0.087    |
| rs12030183  | 1   | 41761220  | T  | 0.015                      | 0.002 | -0.007                | 0.010 | 0.492    | 0.006                    | 0.026 | 0.833    | -0.027                   | 0.020 | 0.184    | -0.008                   | 0.024 | 0.747    |
| rs12042107  | 1   | 91196176  | T  | 0.014                      | 0.002 | 0.013                 | 0.010 | 0.183    | 0.040                    | 0.025 | 0.105    | -0.007                   | 0.019 | 0.737    | 0.004                    | 0.023 | 0.866    |
| rs12150718  | 18  | 42674461  | T  | 0.012                      | 0.002 | -0.011                | 0.011 | 0.340    | 0.001                    | 0.028 | 0.970    | -0.041                   | 0.022 | 0.063    | 0.001                    | 0.026 | 0.979    |
| rs12153007  | 5   | 51026503  | T  | 0.020                      | 0.004 | -0.004                | 0.017 | 0.798    | 0.010                    | 0.042 | 0.802    | 0.008                    | 0.033 | 0.801    | -0.018                   | 0.039 | 0.652    |
| rs12476173  | 2   | 118247714 | A  | 0.012                      | 0.002 | -0.004                | 0.010 | 0.720    | 0.008                    | 0.026 | 0.768    | 0.004                    | 0.020 | 0.834    | -0.001                   | 0.024 | 0.961    |
| rs12662631  | 6   | 93842446  | T  | 0.012                      | 0.002 | 0.009                 | 0.011 | 0.401    | -0.002                   | 0.027 | 0.950    | 0.050                    | 0.021 | 0.016    | 0.013                    | 0.025 | 0.610    |
| rs12690535  | 2   | 226259373 | A  | 0.016                      | 0.003 | 0.009                 | 0.013 | 0.484    | -0.036                   | 0.032 | 0.260    | 0.029                    | 0.025 | 0.252    | 0.038                    | 0.030 | 0.213    |
| rs12757183  | 1   | 216920373 | T  | 0.014                      | 0.003 | 0.021                 | 0.013 | 0.112    | -0.065                   | 0.032 | 0.043    | 0.014                    | 0.025 | 0.587    | 0.010                    | 0.030 | 0.732    |
| rs12787182  | 11  | 59190811  | A  | 0.013                      | 0.002 | -0.001                | 0.011 | 0.916    | -0.016                   | 0.027 | 0.562    | -0.019                   | 0.021 | 0.354    | -0.004                   | 0.025 | 0.891    |
| rs12895462  | 14  | 77615441  | T  | 0.014                      | 0.003 | 0.002                 | 0.013 | 0.868    | 0.044                    | 0.032 | 0.167    | 0.004                    | 0.025 | 0.880    | -0.040                   | 0.029 | 0.168    |
| rs12930834  | 16  | 72951627  | A  | 0.014                      | 0.002 | 0.011                 | 0.012 | 0.350    | 0.089                    | 0.031 | 0.004    | -0.010                   | 0.023 | 0.663    | 0.006                    | 0.028 | 0.844    |
| rs13160204  | 5   | 157734762 | A  | 0.012                      | 0.002 | -0.029                | 0.011 | 0.008    | -0.035                   | 0.027 | 0.191    | -0.056                   | 0.021 | 0.008    | 0.008                    | 0.025 | 0.752    |
| rs13187930  | 5   | 60384171  | T  | 0.014                      | 0.002 | 0.004                 | 0.011 | 0.712    | -0.014                   | 0.028 | 0.624    | 0.011                    | 0.022 | 0.618    | 0.013                    | 0.026 | 0.631    |
| rs13258512  | 8   | 92777433  | A  | 0.015                      | 0.002 | 0.002                 | 0.010 | 0.862    | 0.001                    | 0.025 | 0.978    | 0.008                    | 0.019 | 0.679    | -0.024                   | 0.023 | 0.288    |
| rs13357015  | 5   | 80263403  | A  | 0.014                      | 0.002 | 0.016                 | 0.011 | 0.117    | 0.017                    | 0.026 | 0.517    | 0.011                    | 0.020 | 0.584    | 0.046                    | 0.024 | 0.056    |
| rs1368550   | 2   | 104078655 | T  | 0.019                      | 0.002 | 0.016                 | 0.010 | 0.102    | 0.063                    | 0.025 | 0.010    | 0.003                    | 0.019 | 0.870    | -0.004                   | 0.023 | 0.878    |
| rs1435741   | 15  | 47935843  | A  | 0.016                      | 0.002 | 0.010                 | 0.010 | 0.346    | 0.058                    | 0.025 | 0.019    | 0.011                    | 0.019 | 0.572    | -0.035                   | 0.023 | 0.136    |
| rs146127221 | 10  | 87465134  | T  | 0.042                      | 0.008 | -0.020                | 0.036 | 0.579    | -0.054                   | 0.098 | 0.583    | 0.002                    | 0.075 | 0.984    | 0.122                    | 0.084 | 0.148    |

|            |    |           |   |       |       |        |       |       |        |       |       |        |       |       |        |       |       |
|------------|----|-----------|---|-------|-------|--------|-------|-------|--------|-------|-------|--------|-------|-------|--------|-------|-------|
| rs1549214  | 5  | 166997007 | T | 0.016 | 0.002 | -0.007 | 0.010 | 0.483 | 0.019  | 0.026 | 0.475 | 0.013  | 0.020 | 0.529 | 0.016  | 0.024 | 0.512 |
| rs16951001 | 15 | 67854241  | T | 0.012 | 0.002 | 0.018  | 0.010 | 0.072 | 0.013  | 0.025 | 0.621 | 0.013  | 0.020 | 0.492 | 0.048  | 0.024 | 0.043 |
| rs17496618 | 2  | 44185718  | T | 0.019 | 0.003 | 0.011  | 0.018 | 0.524 | 0.079  | 0.044 | 0.074 | -0.014 | 0.034 | 0.685 | -0.035 | 0.038 | 0.352 |
| rs17733784 | 18 | 53719925  | T | 0.013 | 0.002 | 0.011  | 0.010 | 0.272 | 0.029  | 0.026 | 0.264 | 0.041  | 0.020 | 0.041 | -0.003 | 0.024 | 0.917 |
| rs1919621  | 3  | 34421745  | A | 0.014 | 0.002 | -0.003 | 0.010 | 0.737 | -0.013 | 0.025 | 0.591 | 0.003  | 0.019 | 0.896 | 0.019  | 0.024 | 0.412 |
| rs2185913  | 10 | 115410234 | T | 0.012 | 0.002 | 0.006  | 0.011 | 0.576 | 0.039  | 0.028 | 0.168 | 0.033  | 0.022 | 0.133 | 0.004  | 0.026 | 0.883 |
| rs2236941  | 3  | 50247824  | T | 0.012 | 0.002 | 0.024  | 0.010 | 0.023 | 0.068  | 0.026 | 0.008 | 0.019  | 0.020 | 0.339 | 0.022  | 0.024 | 0.346 |
| rs2291256  | 12 | 133393323 | T | 0.021 | 0.003 | 0.035  | 0.020 | 0.088 | 0.021  | 0.052 | 0.678 | 0.053  | 0.041 | 0.199 | 0.006  | 0.047 | 0.905 |
| rs2585817  | 11 | 28602221  | A | 0.015 | 0.002 | 0.018  | 0.011 | 0.092 | 0.040  | 0.025 | 0.119 | 0.015  | 0.020 | 0.441 | 0.011  | 0.024 | 0.654 |
| rs26251    | 5  | 106837450 | T | 0.013 | 0.002 | -0.008 | 0.011 | 0.457 | -0.022 | 0.026 | 0.400 | -0.021 | 0.023 | 0.353 | 0.006  | 0.025 | 0.803 |
| rs2633725  | 3  | 53751742  | T | 0.015 | 0.003 | -0.008 | 0.014 | 0.584 | -0.015 | 0.035 | 0.676 | -0.006 | 0.028 | 0.844 | -0.020 | 0.033 | 0.552 |
| rs2783130  | 13 | 80170160  | A | 0.011 | 0.002 | 0.019  | 0.010 | 0.062 | 0.027  | 0.025 | 0.271 | 0.002  | 0.019 | 0.912 | 0.000  | 0.023 | 0.997 |
| rs28527775 | 10 | 125700548 | A | 0.014 | 0.002 | -0.007 | 0.011 | 0.560 | 0.001  | 0.029 | 0.966 | -0.014 | 0.022 | 0.525 | 0.013  | 0.026 | 0.615 |
| rs28647734 | 9  | 137977033 | A | 0.017 | 0.003 | 0.006  | 0.013 | 0.656 | 0.020  | 0.032 | 0.532 | 0.031  | 0.025 | 0.216 | 0.041  | 0.030 | 0.175 |
| rs34495106 | 3  | 85651136  | A | 0.021 | 0.002 | 0.011  | 0.010 | 0.288 | 0.062  | 0.025 | 0.015 | 0.018  | 0.020 | 0.346 | 0.012  | 0.024 | 0.613 |
| rs3783177  | 13 | 101151360 | T | 0.014 | 0.002 | -0.008 | 0.012 | 0.521 | -0.052 | 0.029 | 0.077 | 0.007  | 0.023 | 0.769 | -0.025 | 0.028 | 0.358 |
| rs42417    | 5  | 94198290  | T | 0.016 | 0.002 | 0.001  | 0.011 | 0.912 | -0.007 | 0.028 | 0.811 | 0.008  | 0.021 | 0.709 | -0.004 | 0.026 | 0.874 |
| rs4479577  | 3  | 5723818   | T | 0.012 | 0.002 | 0.003  | 0.010 | 0.753 | 0.036  | 0.025 | 0.153 | 0.010  | 0.019 | 0.615 | -0.032 | 0.024 | 0.180 |
| rs4650277  | 1  | 74993721  | A | 0.015 | 0.002 | -0.011 | 0.010 | 0.276 | -0.029 | 0.025 | 0.249 | -0.026 | 0.019 | 0.171 | -0.011 | 0.024 | 0.638 |
| rs4664442  | 2  | 162828001 | A | 0.016 | 0.002 | -0.020 | 0.010 | 0.047 | -0.007 | 0.025 | 0.771 | -0.024 | 0.019 | 0.216 | -0.039 | 0.023 | 0.088 |
| rs4771948  | 13 | 97087892  | T | 0.011 | 0.002 | 0.009  | 0.011 | 0.399 | 0.039  | 0.026 | 0.132 | -0.025 | 0.020 | 0.230 | 0.001  | 0.024 | 0.982 |
| rs4790870  | 17 | 1970201   | A | 0.013 | 0.002 | 0.007  | 0.010 | 0.510 | -0.008 | 0.025 | 0.743 | -0.008 | 0.019 | 0.687 | 0.010  | 0.024 | 0.687 |
| rs479971   | 12 | 69672471  | A | 0.015 | 0.002 | -0.016 | 0.011 | 0.151 | 0.002  | 0.028 | 0.941 | 0.015  | 0.021 | 0.475 | -0.033 | 0.026 | 0.200 |
| rs4814884  | 20 | 19663293  | T | 0.012 | 0.002 | 0.024  | 0.010 | 0.016 | 0.034  | 0.025 | 0.173 | 0.010  | 0.020 | 0.600 | -0.028 | 0.024 | 0.230 |
| rs4888444  | 16 | 75690279  | A | 0.026 | 0.005 | -0.034 | 0.027 | 0.197 | -0.118 | 0.067 | 0.079 | -0.125 | 0.054 | 0.021 | 0.014  | 0.063 | 0.828 |
| rs5003492  | 8  | 93195529  | A | 0.013 | 0.002 | 0.001  | 0.010 | 0.951 | -0.011 | 0.025 | 0.671 | 0.010  | 0.019 | 0.595 | -0.007 | 0.023 | 0.759 |
| rs525444   | 12 | 114110961 | T | 0.015 | 0.003 | -0.018 | 0.013 | 0.160 | -0.064 | 0.033 | 0.056 | -0.039 | 0.024 | 0.107 | 0.006  | 0.029 | 0.831 |
| rs550677   | 12 | 125811056 | A | 0.011 | 0.002 | 0.015  | 0.011 | 0.185 | 0.009  | 0.027 | 0.728 | 0.018  | 0.020 | 0.380 | 0.040  | 0.024 | 0.095 |
| rs553785   | 1  | 96895325  | A | 0.012 | 0.002 | -0.014 | 0.010 | 0.148 | -0.040 | 0.024 | 0.097 | 0.003  | 0.019 | 0.890 | -0.004 | 0.023 | 0.852 |
| rs55921136 | 1  | 210359333 | T | 0.016 | 0.003 | 0.003  | 0.012 | 0.840 | 0.005  | 0.031 | 0.860 | -0.022 | 0.023 | 0.350 | -0.002 | 0.028 | 0.946 |
| rs55974445 | 4  | 147893585 | T | 0.017 | 0.002 | -0.006 | 0.011 | 0.581 | -0.032 | 0.028 | 0.247 | -0.006 | 0.021 | 0.768 | -0.005 | 0.025 | 0.830 |

|            |    |           |   |       |       |        |       |       |        |       |       |        |       |       |        |       |       |
|------------|----|-----------|---|-------|-------|--------|-------|-------|--------|-------|-------|--------|-------|-------|--------|-------|-------|
| rs56081685 | 13 | 59454140  | T | 0.013 | 0.002 | -0.003 | 0.011 | 0.789 | -0.012 | 0.028 | 0.662 | -0.033 | 0.022 | 0.127 | -0.006 | 0.026 | 0.834 |
| rs58695218 | 7  | 39432330  | A | 0.015 | 0.003 | -0.013 | 0.013 | 0.302 | 0.015  | 0.031 | 0.641 | -0.006 | 0.024 | 0.815 | -0.005 | 0.029 | 0.867 |
| rs6061162  | 20 | 29893501  | T | 0.020 | 0.003 | 0.000  | 0.018 | 0.986 | 0.022  | 0.045 | 0.619 | 0.051  | 0.036 | 0.152 | -0.007 | 0.042 | 0.864 |
| rs6119897  | 20 | 31145415  | A | 0.016 | 0.002 | -0.008 | 0.012 | 0.479 | -0.005 | 0.028 | 0.871 | -0.023 | 0.022 | 0.302 | 0.042  | 0.026 | 0.109 |
| rs6452791  | 5  | 87771093  | A | 0.012 | 0.002 | 0.018  | 0.010 | 0.075 | 0.031  | 0.024 | 0.209 | 0.047  | 0.019 | 0.013 | -0.012 | 0.023 | 0.606 |
| rs663175   | 11 | 121533827 | A | 0.013 | 0.002 | -0.007 | 0.011 | 0.522 | 0.021  | 0.025 | 0.403 | -0.011 | 0.019 | 0.573 | -0.004 | 0.024 | 0.871 |
| rs7130826  | 11 | 17037793  | T | 0.013 | 0.002 | -0.013 | 0.011 | 0.240 | -0.039 | 0.028 | 0.156 | -0.052 | 0.022 | 0.016 | 0.017  | 0.026 | 0.502 |
| rs71367545 | 18 | 77576337  | A | 0.016 | 0.003 | 0.002  | 0.014 | 0.888 | 0.011  | 0.034 | 0.739 | 0.024  | 0.028 | 0.389 | 0.027  | 0.031 | 0.383 |
| rs7203668  | 16 | 76462582  | A | 0.012 | 0.002 | 0.027  | 0.010 | 0.007 | 0.035  | 0.025 | 0.151 | 0.025  | 0.019 | 0.191 | -0.005 | 0.023 | 0.845 |
| rs745570   | 17 | 77781725  | A | 0.011 | 0.002 | 0.002  | 0.010 | 0.873 | -0.015 | 0.025 | 0.541 | 0.026  | 0.020 | 0.193 | 0.039  | 0.022 | 0.082 |
| rs7645872  | 3  | 25209801  | T | 0.012 | 0.002 | -0.010 | 0.010 | 0.299 | -0.038 | 0.025 | 0.127 | -0.010 | 0.019 | 0.614 | -0.026 | 0.023 | 0.274 |
| rs78058594 | 11 | 132280286 | A | 0.028 | 0.005 | 0.006  | 0.023 | 0.805 | -0.045 | 0.061 | 0.459 | 0.013  | 0.046 | 0.785 | 0.089  | 0.058 | 0.125 |
| rs8047834  | 16 | 25371716  | A | 0.012 | 0.002 | 0.006  | 0.011 | 0.602 | 0.002  | 0.027 | 0.931 | 0.004  | 0.021 | 0.858 | 0.004  | 0.025 | 0.874 |
| rs883403   | 7  | 99047978  | T | 0.017 | 0.003 | 0.028  | 0.014 | 0.046 | 0.003  | 0.036 | 0.943 | 0.024  | 0.027 | 0.385 | 0.002  | 0.032 | 0.952 |
| rs905871   | 11 | 4661285   | A | 0.012 | 0.002 | -0.005 | 0.011 | 0.647 | 0.043  | 0.027 | 0.113 | 0.007  | 0.021 | 0.727 | -0.042 | 0.025 | 0.088 |
| rs9395644  | 6  | 50923637  | A | 0.020 | 0.004 | 0.036  | 0.016 | 0.027 | 0.082  | 0.041 | 0.045 | 0.011  | 0.032 | 0.727 | 0.011  | 0.038 | 0.773 |
| rs969650   | 9  | 109378080 | T | 0.012 | 0.002 | 0.001  | 0.011 | 0.905 | -0.036 | 0.026 | 0.163 | 0.004  | 0.020 | 0.845 | -0.020 | 0.024 | 0.400 |
| rs10186534 | 2  | 80957117  | T | 0.013 | 0.002 | -0.002 | 0.011 | 0.859 | -0.036 | 0.026 | 0.167 | -0.026 | 0.020 | 0.199 | -0.017 | 0.024 | 0.499 |
| rs1022261  | 4  | 35476300  | A | 0.011 | 0.002 | 0.021  | 0.010 | 0.036 | 0.047  | 0.025 | 0.059 | 0.012  | 0.019 | 0.537 | 0.010  | 0.023 | 0.661 |
| rs1022898  | 13 | 97075261  | A | 0.012 | 0.002 | 0.011  | 0.011 | 0.299 | 0.027  | 0.026 | 0.308 | -0.024 | 0.021 | 0.239 | 0.006  | 0.025 | 0.799 |
| rs10252114 | 7  | 121955468 | T | 0.012 | 0.002 | 0.012  | 0.010 | 0.259 | 0.017  | 0.026 | 0.505 | 0.022  | 0.020 | 0.266 | 0.001  | 0.024 | 0.969 |
| rs10279261 | 7  | 133589846 | A | 0.011 | 0.002 | -0.003 | 0.010 | 0.788 | -0.003 | 0.025 | 0.920 | 0.018  | 0.020 | 0.374 | 0.032  | 0.024 | 0.180 |
| rs10751226 | 11 | 73312252  | T | 0.015 | 0.003 | 0.012  | 0.014 | 0.392 | -0.007 | 0.036 | 0.837 | 0.023  | 0.027 | 0.397 | 0.057  | 0.033 | 0.081 |
| rs10914684 | 1  | 33795572  | A | 0.015 | 0.002 | 0.006  | 0.010 | 0.556 | 0.017  | 0.026 | 0.509 | -0.009 | 0.020 | 0.660 | 0.042  | 0.024 | 0.083 |
| rs10952199 | 7  | 1665339   | T | 0.014 | 0.002 | -0.012 | 0.011 | 0.235 | -0.002 | 0.027 | 0.947 | 0.001  | 0.020 | 0.944 | -0.044 | 0.024 | 0.069 |
| rs10970595 | 9  | 31910764  | T | 0.019 | 0.003 | -0.019 | 0.016 | 0.222 | 0.011  | 0.040 | 0.790 | -0.021 | 0.031 | 0.496 | -0.035 | 0.037 | 0.342 |
| rs11066971 | 12 | 114602860 | T | 0.017 | 0.003 | -0.020 | 0.014 | 0.163 | -0.018 | 0.036 | 0.611 | -0.028 | 0.027 | 0.305 | -0.057 | 0.033 | 0.081 |
| rs1109480  | 12 | 121083279 | A | 0.014 | 0.002 | -0.007 | 0.010 | 0.493 | -0.012 | 0.026 | 0.630 | -0.024 | 0.020 | 0.231 | 0.008  | 0.024 | 0.733 |
| rs11165528 | 1  | 96432794  | T | 0.013 | 0.002 | 0.003  | 0.010 | 0.767 | 0.035  | 0.024 | 0.149 | -0.009 | 0.019 | 0.652 | -0.014 | 0.023 | 0.550 |
| rs11210892 | 1  | 44100084  | A | 0.016 | 0.002 | 0.017  | 0.011 | 0.117 | 0.071  | 0.029 | 0.013 | 0.034  | 0.021 | 0.112 | 0.003  | 0.026 | 0.896 |
| rs11255908 | 10 | 8802912   | T | 0.015 | 0.002 | -0.007 | 0.012 | 0.563 | -0.014 | 0.029 | 0.632 | -0.010 | 0.023 | 0.674 | -0.055 | 0.027 | 0.042 |

|            |    |           |   |       |       |        |       |       |        |       |       |        |       |       |        |       |       |
|------------|----|-----------|---|-------|-------|--------|-------|-------|--------|-------|-------|--------|-------|-------|--------|-------|-------|
| rs11771982 | 7  | 132302248 | T | 0.016 | 0.003 | 0.000  | 0.014 | 0.977 | 0.010  | 0.035 | 0.777 | 0.029  | 0.028 | 0.300 | -0.031 | 0.033 | 0.345 |
| rs11779675 | 8  | 10838461  | A | 0.013 | 0.002 | 0.008  | 0.011 | 0.465 | 0.005  | 0.026 | 0.840 | 0.014  | 0.021 | 0.508 | 0.037  | 0.025 | 0.133 |
| rs11783093 | 8  | 27425349  | T | 0.026 | 0.003 | -0.001 | 0.014 | 0.955 | 0.025  | 0.034 | 0.470 | 0.032  | 0.027 | 0.233 | 0.044  | 0.032 | 0.171 |
| rs11844846 | 14 | 29487668  | A | 0.013 | 0.002 | -0.024 | 0.011 | 0.023 | -0.044 | 0.026 | 0.098 | -0.028 | 0.019 | 0.139 | -0.019 | 0.025 | 0.437 |
| rs11872397 | 18 | 72535282  | A | 0.015 | 0.002 | -0.014 | 0.012 | 0.249 | 0.002  | 0.029 | 0.956 | 0.005  | 0.023 | 0.826 | 0.024  | 0.028 | 0.382 |
| rs12022778 | 1  | 50603995  | A | 0.016 | 0.002 | -0.006 | 0.012 | 0.645 | 0.027  | 0.030 | 0.366 | -0.007 | 0.024 | 0.763 | -0.006 | 0.028 | 0.831 |
| rs12053870 | 3  | 118302515 | T | 0.011 | 0.002 | 0.007  | 0.010 | 0.489 | -0.014 | 0.025 | 0.581 | 0.002  | 0.019 | 0.935 | 0.038  | 0.023 | 0.100 |
| rs12211126 | 6  | 67549451  | T | 0.012 | 0.002 | 0.005  | 0.010 | 0.621 | 0.035  | 0.025 | 0.163 | -0.007 | 0.019 | 0.717 | 0.030  | 0.024 | 0.207 |
| rs1221976  | 18 | 49996136  | A | 0.014 | 0.002 | 0.005  | 0.011 | 0.653 | 0.022  | 0.028 | 0.437 | 0.034  | 0.020 | 0.090 | -0.017 | 0.025 | 0.503 |
| rs12456711 | 18 | 280897    | A | 0.014 | 0.002 | -0.018 | 0.012 | 0.131 | -0.025 | 0.029 | 0.391 | -0.044 | 0.023 | 0.053 | -0.037 | 0.027 | 0.181 |
| rs1246265  | 9  | 86761745  | T | 0.016 | 0.002 | 0.013  | 0.011 | 0.253 | 0.031  | 0.027 | 0.264 | -0.013 | 0.021 | 0.548 | 0.003  | 0.025 | 0.903 |
| rs12517438 | 5  | 30842054  | T | 0.011 | 0.002 | -0.014 | 0.010 | 0.163 | -0.028 | 0.025 | 0.252 | -0.005 | 0.019 | 0.778 | -0.019 | 0.023 | 0.407 |
| rs12535004 | 7  | 114947112 | T | 0.015 | 0.003 | 0.000  | 0.011 | 0.993 | -0.033 | 0.028 | 0.251 | -0.028 | 0.022 | 0.198 | 0.094  | 0.026 | 0.000 |
| rs1271272  | 2  | 207955477 | A | 0.012 | 0.002 | -0.017 | 0.011 | 0.116 | 0.015  | 0.027 | 0.587 | -0.040 | 0.021 | 0.051 | -0.021 | 0.025 | 0.394 |
| rs12997449 | 2  | 179039572 | A | 0.018 | 0.003 | -0.004 | 0.016 | 0.805 | 0.012  | 0.039 | 0.755 | 0.010  | 0.031 | 0.754 | 0.049  | 0.036 | 0.173 |
| rs13396935 | 2  | 653195    | A | 0.019 | 0.003 | 0.005  | 0.013 | 0.729 | 0.027  | 0.033 | 0.414 | -0.012 | 0.026 | 0.638 | 0.010  | 0.031 | 0.740 |
| rs1353911  | 3  | 117777904 | A | 0.025 | 0.003 | 0.019  | 0.014 | 0.174 | 0.014  | 0.034 | 0.677 | 0.007  | 0.027 | 0.785 | 0.089  | 0.033 | 0.006 |
| rs1373129  | 9  | 102153698 | A | 0.013 | 0.002 | 0.021  | 0.010 | 0.040 | 0.042  | 0.024 | 0.086 | 0.013  | 0.019 | 0.487 | -0.023 | 0.023 | 0.305 |
| rs1469908  | 16 | 69764412  | T | 0.014 | 0.002 | -0.006 | 0.010 | 0.558 | -0.017 | 0.025 | 0.499 | -0.041 | 0.020 | 0.037 | 0.033  | 0.024 | 0.167 |
| rs1491617  | 4  | 173033976 | T | 0.013 | 0.002 | 0.011  | 0.011 | 0.279 | 0.018  | 0.027 | 0.497 | 0.044  | 0.020 | 0.027 | 0.029  | 0.024 | 0.235 |
| rs16972552 | 16 | 73810454  | C | 0.018 | 0.003 | -0.012 | 0.016 | 0.463 | 0.035  | 0.040 | 0.378 | -0.008 | 0.032 | 0.800 | 0.032  | 0.038 | 0.404 |
| rs17049905 | 2  | 59301572  | A | 0.020 | 0.003 | 0.010  | 0.018 | 0.581 | 0.037  | 0.040 | 0.349 | -0.002 | 0.032 | 0.947 | -0.050 | 0.038 | 0.188 |
| rs17151637 | 8  | 10153082  | T | 0.015 | 0.002 | 0.000  | 0.011 | 0.986 | 0.005  | 0.027 | 0.854 | -0.024 | 0.021 | 0.252 | 0.023  | 0.025 | 0.370 |
| rs17348216 | 5  | 103924374 | T | 0.016 | 0.003 | -0.010 | 0.013 | 0.446 | 0.005  | 0.032 | 0.871 | -0.031 | 0.025 | 0.219 | 0.071  | 0.031 | 0.019 |
| rs17657924 | 7  | 96625589  | A | 0.013 | 0.002 | -0.002 | 0.011 | 0.844 | 0.019  | 0.027 | 0.487 | 0.032  | 0.021 | 0.121 | -0.029 | 0.025 | 0.238 |
| rs176644   | 15 | 89913632  | T | 0.012 | 0.002 | -0.008 | 0.010 | 0.464 | -0.029 | 0.026 | 0.256 | -0.005 | 0.020 | 0.788 | -0.030 | 0.024 | 0.215 |
| rs1775370  | 1  | 72992856  | T | 0.014 | 0.002 | -0.006 | 0.012 | 0.593 | 0.007  | 0.029 | 0.810 | -0.025 | 0.023 | 0.273 | -0.029 | 0.027 | 0.294 |
| rs1891196  | 1  | 208718672 | A | 0.012 | 0.002 | -0.004 | 0.010 | 0.671 | 0.013  | 0.025 | 0.599 | 0.022  | 0.020 | 0.249 | -0.016 | 0.025 | 0.517 |
| rs2202237  | 17 | 50208784  | T | 0.013 | 0.002 | 0.008  | 0.010 | 0.406 | -0.046 | 0.025 | 0.071 | 0.043  | 0.019 | 0.026 | -0.034 | 0.024 | 0.155 |
| rs2310752  | 1  | 66392405  | A | 0.015 | 0.002 | 0.014  | 0.010 | 0.163 | 0.007  | 0.025 | 0.771 | 0.025  | 0.019 | 0.198 | -0.009 | 0.023 | 0.712 |
| rs2340403  | 1  | 73835777  | T | 0.014 | 0.002 | 0.006  | 0.010 | 0.570 | 0.018  | 0.025 | 0.476 | -0.001 | 0.019 | 0.959 | 0.031  | 0.023 | 0.181 |

|            |    |           |   |       |       |        |       |       |        |       |       |        |       |       |        |       |       |
|------------|----|-----------|---|-------|-------|--------|-------|-------|--------|-------|-------|--------|-------|-------|--------|-------|-------|
| rs2358443  | 2  | 174930016 | T | 0.011 | 0.002 | -0.025 | 0.010 | 0.016 | 0.007  | 0.025 | 0.786 | -0.027 | 0.019 | 0.161 | -0.066 | 0.023 | 0.005 |
| rs239245   | 6  | 101090377 | A | 0.011 | 0.002 | -0.008 | 0.010 | 0.426 | 0.018  | 0.025 | 0.459 | 0.029  | 0.019 | 0.132 | 0.015  | 0.023 | 0.521 |
| rs240955   | 6  | 111660643 | A | 0.026 | 0.003 | -0.010 | 0.013 | 0.459 | 0.030  | 0.032 | 0.349 | -0.001 | 0.025 | 0.977 | 0.009  | 0.030 | 0.775 |
| rs2419903  | 2  | 60528052  | T | 0.014 | 0.002 | 0.007  | 0.010 | 0.485 | 0.011  | 0.025 | 0.658 | -0.019 | 0.019 | 0.337 | -0.035 | 0.023 | 0.137 |
| rs2652434  | 2  | 155742894 | T | 0.011 | 0.002 | 0.025  | 0.010 | 0.012 | 0.038  | 0.025 | 0.124 | 0.005  | 0.019 | 0.778 | 0.010  | 0.023 | 0.672 |
| rs28459916 | 4  | 80330743  | A | 0.017 | 0.003 | 0.016  | 0.015 | 0.278 | 0.029  | 0.036 | 0.424 | 0.043  | 0.029 | 0.137 | 0.015  | 0.035 | 0.676 |
| rs2866724  | 16 | 13760152  | A | 0.014 | 0.002 | 0.000  | 0.011 | 0.985 | -0.010 | 0.028 | 0.712 | 0.003  | 0.022 | 0.886 | 0.040  | 0.026 | 0.128 |
| rs288175   | 5  | 107352079 | A | 0.012 | 0.002 | 0.015  | 0.010 | 0.126 | 0.022  | 0.027 | 0.417 | 0.006  | 0.021 | 0.780 | 0.084  | 0.025 | 0.001 |
| rs2939756  | 11 | 41436297  | A | 0.012 | 0.002 | 0.017  | 0.010 | 0.084 | 0.025  | 0.025 | 0.322 | 0.005  | 0.019 | 0.805 | 0.032  | 0.024 | 0.177 |
| rs301805   | 1  | 8481016   | T | 0.011 | 0.002 | 0.021  | 0.010 | 0.041 | 0.039  | 0.025 | 0.115 | 0.041  | 0.020 | 0.036 | -0.019 | 0.024 | 0.431 |
| rs3026629  | 22 | 38329285  | A | 0.012 | 0.002 | 0.006  | 0.010 | 0.556 | 0.017  | 0.026 | 0.513 | 0.016  | 0.020 | 0.430 | 0.025  | 0.024 | 0.305 |
| rs35875412 | 6  | 28331818  | T | 0.014 | 0.003 | 0.005  | 0.013 | 0.684 | -0.052 | 0.030 | 0.088 | 0.046  | 0.025 | 0.062 | 0.008  | 0.028 | 0.770 |
| rs35891966 | 11 | 20129311  | A | 0.024 | 0.004 | 0.004  | 0.028 | 0.890 | 0.005  | 0.074 | 0.942 | 0.024  | 0.055 | 0.661 | 0.019  | 0.061 | 0.761 |
| rs3800227  | 6  | 108994161 | A | 0.013 | 0.002 | -0.008 | 0.011 | 0.488 | -0.004 | 0.028 | 0.897 | -0.016 | 0.022 | 0.465 | -0.049 | 0.026 | 0.057 |
| rs3818987  | 6  | 37484606  | T | 0.014 | 0.002 | 0.020  | 0.010 | 0.048 | -0.033 | 0.025 | 0.188 | 0.000  | 0.019 | 0.994 | 0.016  | 0.023 | 0.483 |
| rs3851186  | 11 | 85931325  | T | 0.015 | 0.003 | 0.003  | 0.012 | 0.829 | 0.013  | 0.030 | 0.677 | 0.035  | 0.024 | 0.142 | -0.036 | 0.028 | 0.193 |
| rs3980078  | 2  | 113328043 | A | 0.016 | 0.003 | 0.028  | 0.013 | 0.026 | -0.016 | 0.032 | 0.612 | 0.003  | 0.024 | 0.903 | 0.073  | 0.030 | 0.013 |
| rs4543592  | 9  | 3014254   | T | 0.013 | 0.002 | -0.007 | 0.010 | 0.503 | -0.035 | 0.027 | 0.199 | -0.025 | 0.019 | 0.192 | 0.032  | 0.023 | 0.170 |
| rs4680392  | 3  | 157404329 | T | 0.014 | 0.002 | -0.009 | 0.011 | 0.389 | 0.009  | 0.027 | 0.749 | -0.017 | 0.021 | 0.418 | 0.018  | 0.025 | 0.471 |
| rs4737525  | 8  | 59799781  | A | 0.013 | 0.002 | 0.017  | 0.010 | 0.084 | 0.015  | 0.025 | 0.542 | -0.015 | 0.019 | 0.443 | -0.012 | 0.023 | 0.591 |
| rs4748779  | 10 | 22288132  | T | 0.014 | 0.002 | -0.017 | 0.011 | 0.120 | -0.002 | 0.028 | 0.930 | -0.043 | 0.022 | 0.049 | -0.030 | 0.026 | 0.250 |
| rs4837631  | 9  | 122061948 | T | 0.013 | 0.002 | 0.006  | 0.010 | 0.533 | -0.031 | 0.025 | 0.200 | 0.018  | 0.019 | 0.337 | -0.006 | 0.023 | 0.809 |
| rs4949465  | 1  | 32178489  | T | 0.018 | 0.003 | 0.002  | 0.014 | 0.893 | -0.039 | 0.036 | 0.278 | 0.036  | 0.028 | 0.191 | -0.006 | 0.034 | 0.854 |
| rs4984916  | 16 | 749057    | A | 0.017 | 0.002 | -0.012 | 0.012 | 0.322 | -0.052 | 0.030 | 0.079 | -0.016 | 0.023 | 0.496 | 0.009  | 0.029 | 0.760 |
| rs55646170 | 1  | 99455931  | T | 0.022 | 0.004 | 0.032  | 0.018 | 0.079 | 0.045  | 0.045 | 0.319 | 0.044  | 0.035 | 0.213 | 0.014  | 0.042 | 0.738 |
| rs58400863 | 4  | 31184484  | A | 0.014 | 0.002 | -0.006 | 0.011 | 0.589 | -0.014 | 0.027 | 0.615 | 0.004  | 0.021 | 0.838 | -0.042 | 0.025 | 0.093 |
| rs6059913  | 20 | 33143288  | A | 0.012 | 0.002 | 0.002  | 0.010 | 0.812 | 0.004  | 0.025 | 0.881 | 0.028  | 0.019 | 0.149 | 0.002  | 0.023 | 0.944 |
| rs6265     | 11 | 27679916  | T | 0.022 | 0.003 | 0.015  | 0.013 | 0.261 | 0.052  | 0.033 | 0.109 | 0.034  | 0.026 | 0.183 | 0.026  | 0.031 | 0.404 |
| rs6438208  | 3  | 114170272 | A | 0.013 | 0.002 | 0.008  | 0.012 | 0.518 | 0.014  | 0.031 | 0.659 | 0.026  | 0.024 | 0.287 | 0.011  | 0.028 | 0.707 |
| rs6598539  | 15 | 99204483  | T | 0.013 | 0.002 | 0.013  | 0.010 | 0.209 | 0.010  | 0.025 | 0.703 | 0.022  | 0.019 | 0.252 | 0.006  | 0.023 | 0.794 |
| rs6676022  | 1  | 154162503 | T | 0.022 | 0.003 | 0.020  | 0.015 | 0.187 | 0.014  | 0.038 | 0.720 | 0.020  | 0.030 | 0.500 | 0.060  | 0.036 | 0.098 |

|            |    |           |   |       |       |        |       |       |        |       |       |        |       |       |        |       |       |
|------------|----|-----------|---|-------|-------|--------|-------|-------|--------|-------|-------|--------|-------|-------|--------|-------|-------|
| rs6720647  | 2  | 137615688 | A | 0.014 | 0.002 | 0.003  | 0.012 | 0.778 | 0.005  | 0.030 | 0.861 | 0.028  | 0.023 | 0.229 | -0.015 | 0.028 | 0.585 |
| rs6965740  | 7  | 117514840 | T | 0.014 | 0.002 | 0.008  | 0.010 | 0.409 | -0.003 | 0.025 | 0.891 | -0.001 | 0.019 | 0.971 | 0.008  | 0.023 | 0.740 |
| rs6971782  | 7  | 70526891  | T | 0.012 | 0.002 | 0.010  | 0.011 | 0.349 | -0.027 | 0.027 | 0.308 | 0.002  | 0.021 | 0.924 | 0.004  | 0.025 | 0.858 |
| rs7092200  | 10 | 104844872 | T | 0.020 | 0.002 | 0.010  | 0.010 | 0.336 | -0.058 | 0.026 | 0.023 | -0.012 | 0.019 | 0.536 | 0.007  | 0.023 | 0.778 |
| rs7160389  | 14 | 98650988  | T | 0.012 | 0.002 | 0.021  | 0.010 | 0.039 | -0.019 | 0.025 | 0.451 | -0.001 | 0.019 | 0.980 | 0.060  | 0.024 | 0.011 |
| rs72678864 | 4  | 112422145 | A | 0.018 | 0.003 | -0.001 | 0.014 | 0.957 | 0.030  | 0.035 | 0.394 | -0.057 | 0.027 | 0.038 | -0.014 | 0.032 | 0.654 |
| rs72733235 | 9  | 38275772  | T | 0.017 | 0.003 | 0.023  | 0.014 | 0.095 | 0.042  | 0.034 | 0.224 | 0.045  | 0.023 | 0.051 | 0.028  | 0.032 | 0.390 |
| rs7295765  | 12 | 86459040  | A | 0.015 | 0.003 | 0.018  | 0.013 | 0.163 | -0.022 | 0.032 | 0.491 | 0.017  | 0.025 | 0.500 | 0.072  | 0.029 | 0.014 |
| rs7333559  | 13 | 100546450 | A | 0.016 | 0.003 | 0.002  | 0.013 | 0.892 | -0.010 | 0.033 | 0.760 | 0.011  | 0.025 | 0.674 | 0.015  | 0.030 | 0.611 |
| rs7575189  | 2  | 174015168 | A | 0.011 | 0.002 | 0.004  | 0.010 | 0.677 | -0.011 | 0.025 | 0.664 | 0.013  | 0.019 | 0.489 | 0.012  | 0.023 | 0.617 |
| rs76608582 | 19 | 4474725   | A | 0.033 | 0.005 | 0.014  | 0.028 | 0.612 | 0.035  | 0.080 | 0.664 | -0.001 | 0.057 | 0.991 | 0.030  | 0.071 | 0.667 |
| rs772921   | 12 | 56403577  | T | 0.012 | 0.002 | -0.003 | 0.011 | 0.769 | 0.018  | 0.026 | 0.493 | -0.015 | 0.023 | 0.522 | -0.001 | 0.025 | 0.977 |
| rs7754741  | 6  | 98749329  | T | 0.015 | 0.002 | -0.005 | 0.011 | 0.655 | -0.015 | 0.028 | 0.581 | -0.031 | 0.021 | 0.143 | 0.019  | 0.026 | 0.463 |
| rs78175438 | 21 | 40663255  | T | 0.019 | 0.003 | 0.024  | 0.016 | 0.131 | -0.023 | 0.040 | 0.557 | 0.040  | 0.031 | 0.188 | 0.018  | 0.036 | 0.614 |
| rs7870475  | 9  | 128134034 | T | 0.013 | 0.002 | 0.009  | 0.010 | 0.362 | 0.022  | 0.025 | 0.365 | 0.011  | 0.019 | 0.571 | -0.027 | 0.023 | 0.232 |
| rs78954884 | 16 | 17956466  | A | 0.025 | 0.005 | -0.058 | 0.033 | 0.077 | -0.080 | 0.084 | 0.342 | -0.067 | 0.063 | 0.285 | -0.053 | 0.077 | 0.492 |
| rs7901883  | 10 | 103186838 | A | 0.013 | 0.002 | 0.000  | 0.012 | 0.993 | 0.013  | 0.030 | 0.659 | 0.026  | 0.024 | 0.271 | -0.023 | 0.028 | 0.425 |
| rs7905987  | 10 | 63666637  | A | 0.018 | 0.002 | 0.006  | 0.010 | 0.583 | 0.013  | 0.025 | 0.617 | 0.009  | 0.019 | 0.625 | -0.019 | 0.023 | 0.429 |
| rs7938812  | 11 | 112911004 | T | 0.030 | 0.002 | 0.016  | 0.010 | 0.129 | 0.045  | 0.026 | 0.083 | 0.006  | 0.020 | 0.779 | 0.035  | 0.024 | 0.140 |
| rs9329342  | 10 | 13532648  | T | 0.011 | 0.002 | 0.023  | 0.010 | 0.026 | 0.046  | 0.026 | 0.070 | 0.058  | 0.020 | 0.003 | 0.032  | 0.024 | 0.178 |
| rs9388686  | 6  | 129425564 | A | 0.014 | 0.003 | 0.013  | 0.013 | 0.323 | 0.061  | 0.033 | 0.062 | 0.011  | 0.025 | 0.669 | -0.004 | 0.030 | 0.894 |
| rs9571576  | 13 | 66936133  | T | 0.011 | 0.002 | -0.016 | 0.010 | 0.110 | -0.006 | 0.025 | 0.803 | -0.030 | 0.019 | 0.122 | -0.020 | 0.023 | 0.397 |
| rs961414   | 2  | 146113733 | T | 0.022 | 0.002 | -0.002 | 0.010 | 0.883 | 0.014  | 0.025 | 0.586 | 0.002  | 0.019 | 0.927 | 0.005  | 0.023 | 0.824 |
| rs962472   | 10 | 56700597  | T | 0.012 | 0.002 | -0.006 | 0.010 | 0.553 | -0.013 | 0.025 | 0.614 | -0.021 | 0.019 | 0.288 | -0.003 | 0.023 | 0.883 |

abbreviations: CE-IS, cardioembolic ischemic stroke; Chr, chromosome; EA, effect allele; IS, ischemic stroke; LV-IS, large artery ischemic stroke; Pos, position; SE, standard error; SNP, single nucleotide polymorphism; SV-IS, small vessel ischemic stroke.

\* Results ( $\beta$  and SE) were derived from a genome-wide association study of smoking (ever smoker vs. never smoker).

† Results ( $\beta$ , SE and  $P$ ) were derived from the MEGASTROKE consortium.

**Supplementary Table II.** The effect estimates for the associations of smoking with ischemic stroke after excluding the invalid instruments using the IVW method.

| Outcomes                      | Number of SNPs | OR   | 95% CI    | <i>P</i> -value |
|-------------------------------|----------------|------|-----------|-----------------|
| Ischemic stroke               | 171            | 1.19 | 1.06-1.34 | 0.003           |
| Cardioembolic ischemic stroke | 174            | 1.13 | 0.90-1.41 | 0.289           |
| Small vessel ischemic stroke  | 174            | 1.24 | 0.95-1.62 | 0.115           |

Abbreviations: CI, confidence interval; OR, odds ratio; SNP, single nucleotide polymorphism.



**Supplementary Table III.** Associations between smoking loci and other traits (from the GWAS catalog)\*

| SNP        | Chr | Trait (Reference)                                 | P-value             |
|------------|-----|---------------------------------------------------|---------------------|
| rs11210892 | 1   | Autism spectrum disorder <sup>1</sup>             | $4 \times 10^{-10}$ |
|            |     | Schizophrenia <sup>2</sup>                        | $3 \times 10^{-10}$ |
| rs12042107 | 1   | Risky sexual behaviour measurement <sup>3</sup>   | $9 \times 10^{-12}$ |
|            |     | Self reported educational attainment <sup>4</sup> | $7 \times 10^{-9}$  |
| rs4664442  | 2   | Intelligence <sup>5</sup>                         | $5 \times 10^{-17}$ |
| rs72678864 | 4   | Self reported educational attainment <sup>6</sup> | $2 \times 10^{-9}$  |
| rs12517438 | 5   | Well-being measurement <sup>7</sup>               | $4 \times 10^{-8}$  |
| rs11783093 | 8   | Schizophrenia <sup>8</sup>                        | $8 \times 10^{-12}$ |
| rs17151637 | 8   | Mathematical ability <sup>6</sup>                 | $8 \times 10^{-11}$ |
| rs35891966 | 11  | Intelligence <sup>9</sup>                         | $1 \times 10^{-8}$  |
| rs6265     | 11  | Body mass index <sup>10</sup>                     | $2 \times 10^{-51}$ |
|            |     | Hip circumference <sup>11</sup>                   | $1 \times 10^{-14}$ |
| rs11065979 | 12  | Risk-taking behaviour <sup>3</sup>                | $3 \times 10^{-10}$ |
|            |     | Alcohol drinking <sup>12</sup>                    | $2 \times 10^{-22}$ |
|            |     | Basophil count <sup>13</sup>                      | $1 \times 10^{-12}$ |
|            |     | Blood protein measurement <sup>14</sup>           | $2 \times 10^{-12}$ |
|            |     | Diastolic blood pressure <sup>12</sup>            | $2 \times 10^{-45}$ |
|            |     | Intraocular pressure measurement <sup>15</sup>    | $3 \times 10^{-9}$  |
|            |     | Mean arterial pressure <sup>12</sup>              | $2 \times 10^{-14}$ |
|            |     | Parental longevity <sup>16</sup>                  | $2 \times 10^{-12}$ |
|            |     | Primary biliary cirrhosis <sup>17</sup>           | $3 \times 10^{-9}$  |
|            |     | Psoriasis <sup>18</sup>                           | $2 \times 10^{-8}$  |
| rs772921   | 12  | Systolic blood pressure <sup>12</sup>             | $2 \times 10^{-22}$ |
|            |     | Heel bone mineral density <sup>19</sup>           | $9 \times 10^{-10}$ |

|            |    |                                                    |                     |
|------------|----|----------------------------------------------------|---------------------|
| rs7160389  | 14 | Eosinophil count <sup>19</sup>                     | $3 \times 10^{-8}$  |
| rs2202237  | 17 | Blood protein measurement <sup>20</sup>            | $5 \times 10^{-10}$ |
| rs745570   | 17 | Breast carcinoma <sup>21</sup>                     | $1 \times 10^{-9}$  |
| rs76608582 | 19 | Intelligence <sup>22</sup>                         | $3 \times 10^{-8}$  |
|            |    | Self-reported educational attainment <sup>19</sup> | $1 \times 10^{-9}$  |

---

Abbreviations: Chr, chromosome; SNP, single nucleotide polymorphism.

\* SNPs associated with secondary traits according to previous genome-wide association studies.

Any ambiguities were not shown in this table.

### **Members of MEGASTROKE consortium**

We gratefully acknowledge the contributing studies and databases (MEGASTROKE project) that made GWAS summary data available. We acknowledge the contributions of Rainer Malik, Ganesh Chauhan, Matthew Traylor, Muralidharan Sargurupremraj, Yukinori Okada, Aniket Mishra, Loes Rutten-Jacobs, Anne-Katrin Giese, Sander W. van der Laan, Solveig Gretarsdottir, Christopher D. Anderson, Michael Chong, Hieab H. H. Adams, Tetsuro Ago, Peter Almgren, Philippe Amouyel, Hakan Ay, Traci M. Bartz, Oscar R. Benavente, Steve Bevan, Giorgio B. Boncoraglio, Robert D. Brown, Jr, Adam S. Butterworth, Caty Carrera, Cara L. Carty, Daniel I. Chasman, Wei-Min Chen, John W. Cole, Adolfo Correa, Ioana Cotlarciuc, Carlos Cruchaga, John Danesh, Paul I. W. de Bakker, Anita L. DeStefano, Marcel den Hoed, Qing Duan, Stefan T. Engelter, Guido J. Falcone, Rebecca F. Gottesman, Raji P. Grewal, Vilmundur Gudnason, Stefan Gustafsson, Jeffrey Haessler, Tamara B. Harris, Ahamad Hassan, Aki S. Havulinna, Susan R. Heckbert, Elizabeth G. Holliday, George Howard, Fang-Chi Hsu, Hyacinth I. Hyacinth, M. Arfan Ikram, Erik Ingelsson, Marguerite R. Irvin, Xueqiu Jian, Jordi Jimenez-Conde, Julie A. Johnson, J. Wouter Jukema, Masahiro Kanai, Keith L. Keene, Brett M. Kissela, Dawn O. Kleindorfer, Charles Kooperberg, Michiaki Kubo, Leslie A. Lange, Carl D. Langefeld, Claudia Langenberg, Lenore J. Launer, Jin-Moo Lee, Robin Lemmens, Didier Leys, Cathryn M. Lewis, Wei-Yu Lin, Arne G. Lindgren, Erik Lorentzen, Patrik K. Magnusson, Jane Maguire, Ani Manichaikul, Patrick F. McArdle, James F. Meschia, Braxton D. Mitchell, Thomas H. Mosley, Michael A. Nalls, Toshiharu Ninomiya, Martin J. O'Donnell, Bruce M. Psaty, Sara L. Pulit, Kristiina Rannikmäe, Alexander P. Reiner, Kathryn M. Rexrode, Kenneth Rice, Stephen S. Rich, Paul M. Ridker, Natalia S. Rost, Peter M. Rothwell, Jerome I. Rotter, Tatjana Rundek, Ralph L. Sacco, Saori Sakaue, Michele M. Sale, Veikko Salomaa, Bishwa R. Sapkota, Reinhold Schmidt, Carsten O. Schmidt, Ulf Schminke, Pankaj Sharma, Agnieszka Slowik, Cathie L. M. Sudlow, Christian Tanislav, Turgut Tatlisumak, Kent D. Taylor, Vincent N. S. Thijs, Gudmar Thorleifsson, Unnur Thorsteinsdottir, Steffen Tiedt, Stella Trompet, Christophe Tzourio, Cornelia M. van Duijn, Matthew Walters, Nicholas J. Wareham, Sylvia Wassertheil-Smoller, James G. Wilson, Kerri L. Wiggins, Qiong Yang, Salim Yusuf, AFGen Consortium, Cohorts for Heart and Aging Research in Genomic Epidemiology (CHARGE) Consortium, International Genomics of Blood Pressure (iGEN-BP) Consortium, INVENT Consortium, STARNET, Joshua C. Bis, Tomi Pastinen, Arno Ruusalepp, Eric E. Schadt, Simon Koplev, Johan L. M. Björkegren, Veronica Codoni, Mete Civelek, Nicholas L. Smith, David A. Tregouet, Ingrid E. Christophersen, Carolina Roselli, Steven A. Lubitz, Patrick T. Ellinor, E. Shyong Tai, Jaspal S. Kooner, Norihiro Kato, Jiang He, Pim van der Harst, Paul Elliott, John C. Chambers, Fumihiko Takeuchi, Andrew D. Johnson, BioBank Japan Cooperative Hospital Group, COMPASS Consortium, EPiC-CVD Consortium, EPiC-interAct Consortium, International Stroke Genetics Consortium (ISGC), METASTROKE Consortium, Neurology Working Group of the CHARGE

Consortium, NiNDS Stroke Genetics Network (SiGN), UK Young Lacunar DNA Study, MEGASTROKE Consortium, Dharambir K. Sanghera, Olle Melander, Christina Jern, Daniel Strbian, Israel Fernandez-Cadenas, W. T. Longstreth, Jr, Arndt Rolfs, Jun Hata, Daniel Woo, Jonathan Rosand, Guillaume Pare, Jemma C. Hopewell, Danish Saleheen, Kari Stefansson, Bradford B. Worrall, Steven J. Kittner, Sudha Seshadri, Myriam Fornage, Hugh S. Markus, Joanna M. M. Howson, Yoichiro Kamatani, Stephanie Debette, and Martin Dichgans.

## Reference

1. Autism Spectrum Disorders Working Group of The Psychiatric Genomics C. Meta-analysis of gwas of over 16,000 individuals with autism spectrum disorder highlights a novel locus at 10q24.32 and a significant overlap with schizophrenia. *Molecular autism*. 2017;8:21
2. Schizophrenia Working Group of the Psychiatric Genomics C. Biological insights from 108 schizophrenia-associated genetic loci. *Nature*. 2014;511:421-427
3. Karlsson Linner R, Biroli P, Kong E, Meddens SFW, Wedow R, Fontana MA, et al. Genome-wide association analyses of risk tolerance and risky behaviors in over 1 million individuals identify hundreds of loci and shared genetic influences. *Nature genetics*. 2019;51:245-257
4. Davies G, Marioni RE, Liewald DC, Hill WD, Hagenaars SP, Harris SE, et al. Genome-wide association study of cognitive functions and educational attainment in uk biobank (n=112 151). *Molecular psychiatry*. 2016;21:758-767
5. Hill WD, Marioni RE, Maghzian O, Ritchie SJ, Hagenaars SP, McIntosh AM, et al. A combined analysis of genetically correlated traits identifies 187 loci and a role for neurogenesis and myelination in intelligence. *Molecular psychiatry*. 2019;24:169-181
6. Lee JJ, Wedow R, Okbay A, Kong E, Maghzian O, Zacher M, et al. Gene discovery and polygenic prediction from a genome-wide association study of educational attainment in 1.1 million individuals. *Nature genetics*. 2018;50:1112-1121
7. Baselmans BML, Jansen R, Ip HF, van Dongen J, Abdellaoui A, van de Weijer MP, et al. Multivariate genome-wide analyses of the well-being spectrum. *Nature genetics*. 2019;51:445-451
8. Pardini AF, Holmans P, Pocklington AJ, Escott-Price V, Ripke S, Carrera N, et al. Common schizophrenia alleles are enriched in mutation-intolerant genes and in regions under strong background selection. *Nature genetics*. 2018;50:381-389
9. Davies G, Lam M, Harris SE, Trampush JW, Luciano M, Hill WD, et al. Study of 300,486 individuals identifies 148 independent genetic loci influencing general cognitive function. *Nature communications*. 2018;9:2098
10. Akiyama M, Okada Y, Kanai M, Takahashi A, Momozawa Y, Ikeda M, et al. Genome-wide association study identifies 112 new loci for body mass index in the japanese population. *Nature genetics*. 2017;49:1458-1467
11. Shungin D, Winkler TW, Croteau-Chonka DC, Ferreira T, Locke AE, Magi R, et al. New genetic loci link adipose and insulin biology to body fat distribution. *Nature*. 2015;518:187-196
12. Feitosa MF, Kraja AT, Chasman DI, Sung YJ, Winkler TW, Ntalla I, et al. Novel genetic associations for blood pressure identified via gene-alcohol interaction in up to 570k individuals across multiple ancestries. *PloS one*. 2018;13:e0198166
13. Astle WJ, Elding H, Jiang T, Allen D, Ruklisa D, Mann AL, et al. The allelic landscape of human blood cell trait variation and links to common complex disease. *Cell*. 2016;167:1415-1429 e1419

14. Sun BB, Maranville JC, Peters JE, Stacey D, Staley JR, Blackshaw J, et al. Genomic atlas of the human plasma proteome. *Nature*. 2018;558:73-79
15. MacGregor S, Ong JS, An J, Han X, Zhou T, Siggs OM, et al. Genome-wide association study of intraocular pressure uncovers new pathways to glaucoma. *Nature genetics*. 2018;50:1067-1071
16. Pilling LC, Kuo CL, Sicinski K, Tamosauskaite J, Kuchel GA, Harries LW, et al. Human longevity: 25 genetic loci associated in 389,166 uk biobank participants. *Aging*. 2017;9:2504-2520
17. Liu JZ, Almarri MA, Gaffney DJ, Mells GF, Jostins L, Cordell HJ, et al. Dense fine-mapping study identifies new susceptibility loci for primary biliary cirrhosis. *Nature genetics*. 2012;44:1137-1141
18. Tsoi LC, Stuart PE, Tian C, Gudjonsson JE, Das S, Zawistowski M, et al. Large scale meta-analysis characterizes genetic architecture for common psoriasis associated variants. *Nature communications*. 2017;8:15382
19. Kichaev G, Bhatia G, Loh PR, Gazal S, Burch K, Freund MK, et al. Leveraging polygenic functional enrichment to improve gwas power. *American journal of human genetics*. 2019;104:65-75
20. Emilsson V, Ilkov M, Lamb JR, Finkel N, Gudmundsson EF, Pitts R, et al. Co-regulatory networks of human serum proteins link genetics to disease. *Science*. 2018;361:769-773
21. Michailidou K, Beesley J, Lindstrom S, Canisius S, Dennis J, Lush MJ, et al. Genome-wide association analysis of more than 120,000 individuals identifies 15 new susceptibility loci for breast cancer. *Nature genetics*. 2015;47:373-380
22. Savage JE, Jansen PR, Stringer S, Watanabe K, Bryois J, de Leeuw CA, et al. Genome-wide association meta-analysis in 269,867 individuals identifies new genetic and functional links to intelligence. *Nature genetics*. 2018;50:912-919
